# Supplementary material for: Highly stable Ni/SiC catalyst modified by Al2O3 for CO methanation reaction
Source: Royal Society of Chemistry journal article supplement (doi:10.1039/c5ra19940a), 2016-01-01
Supplement: c5ra19940a1.pdf [file c5ra19940a1.pdf]

## Supporting Information

### Highly Stable Ni/SiC Catalyst Modified by Al<sub>2</sub>O<sub>3</sub> for CO Methanation Reaction

Guojing Jin<sup>a,b</sup>, Fangna Gu<sup>b,\*</sup>, Qing Liu<sup>b</sup>, Xiaoyan Wang<sup>b</sup>,

Lihua Jia<sup>a,\*</sup>, Guangwen Xu<sup>b</sup>, Ziyi Zhong<sup>c</sup>, and Fabin Su<sup>b,\*</sup>

<sup>a</sup> *College of Chemistry and Chemical Engineering, Qiqihaer University, Qiqihaer 161006, Heilongjiang Province, China*

<sup>b</sup> *State Key Laboratory of Multiphase Complex Systems, Institute of Process Engineering, Chinese Academy of Sciences, Beijing 100190, China*

<sup>c</sup> *Institute of Chemical Engineering and Sciences, A\*star, 1 Pesek Road, Jurong Island 627833, Singapore*

**Table S1** The impurities of SiC measured by XRF and its physical properties

| Impurity Elements    | Fe     | O      | Al     | Physical Properties | $S_{\text{BET}}^a$<br>( $\text{m}^2 \text{g}^{-1}$ ) | $V_p^b$<br>( $\text{cm}^3 \text{g}^{-1}$ ) |
|----------------------|--------|--------|--------|---------------------|------------------------------------------------------|--------------------------------------------|
| Content/<br>Weight % | 0.0297 | 0.0413 | 0.0104 |                     | 1                                                    | 0.003                                      |

<sup>a</sup> Surface area derived from BET equation.

<sup>b</sup> Pore volume obtained from the volume of nitrogen adsorbed at the relative pressure of 0.97.

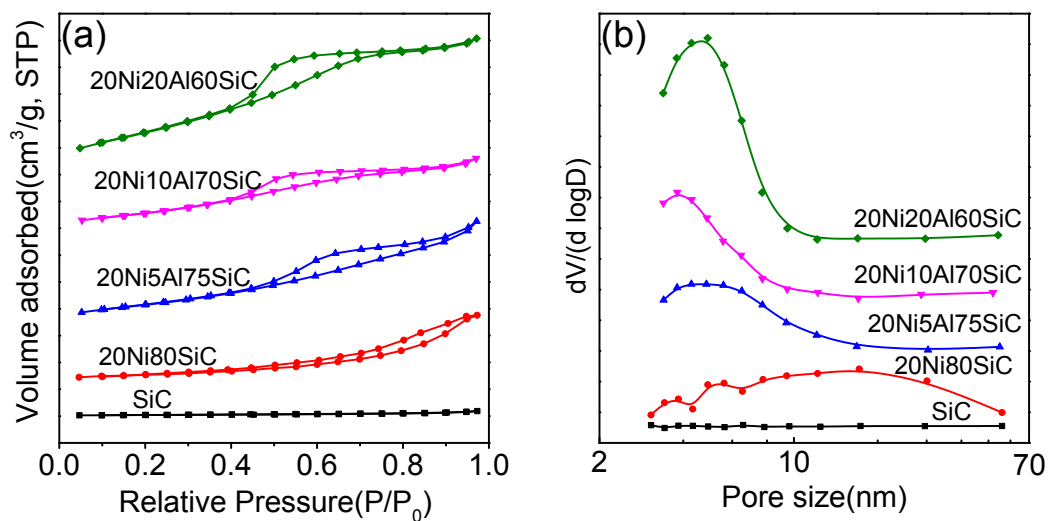

**Fig. S1** N<sub>2</sub> adsorption isotherms (a) and Pore size distribution curves (b) of all the as-calcined samples.

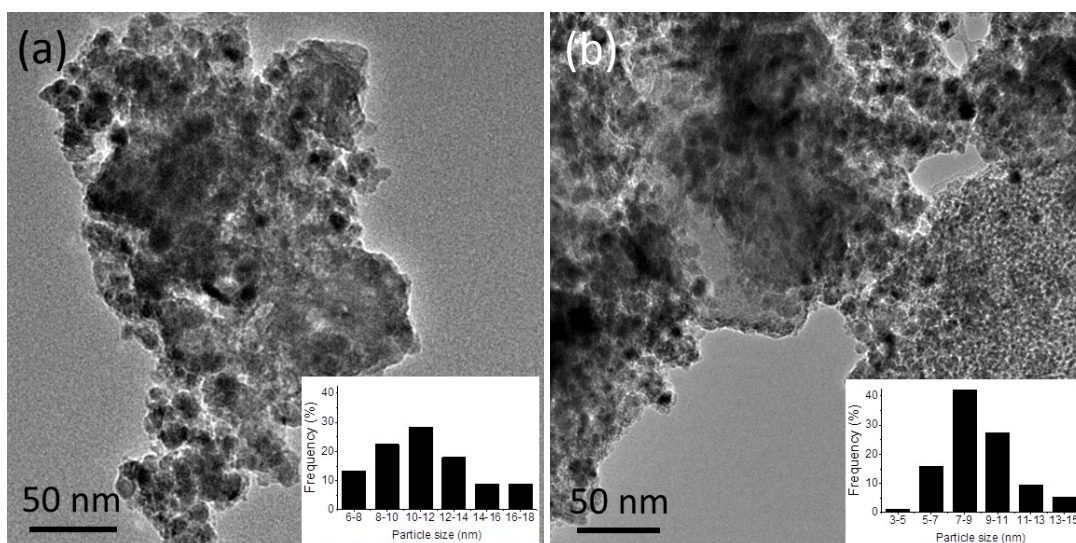

**Fig. S2** TEM images of the reduced catalysts: (a) 20Ni5Al75SiC, (b) 20Ni20Al60SiC.

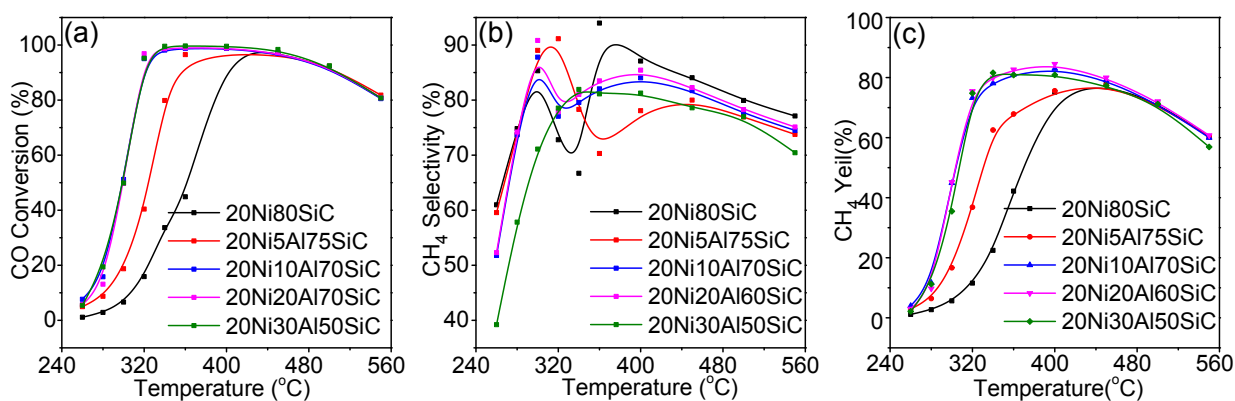

**Fig. S3** Catalytic performances of catalysts in CO methanation under different reaction temperatures at 0.1 MPa and WHSV of 120 000 mL g<sup>-1</sup> h<sup>-1</sup>: (a) CO conversion, (b) CH<sub>4</sub> selectivity, and (c) CH<sub>4</sub> yield.

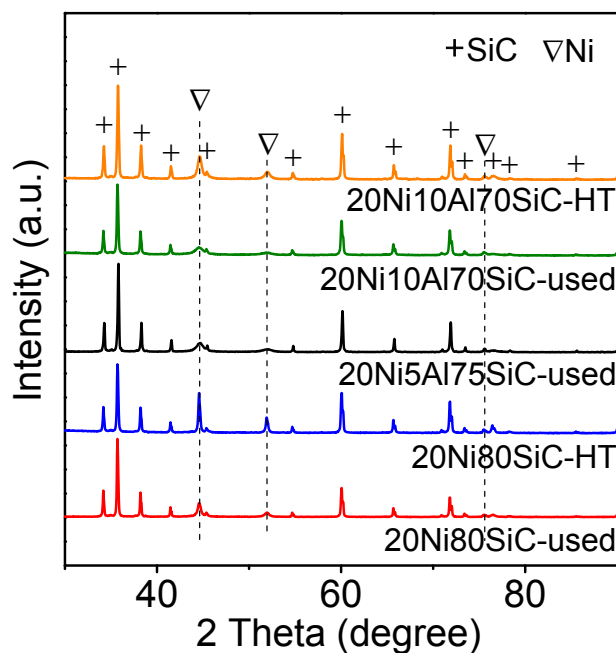

**Fig. S4** The wide-angle XRD patterns of 20Ni80SiC, 20Ni5Al75SiC and 20Ni10Al70SiC after lifetime test and 20Ni80SiC, 20Ni10Al70SiC after hydrothermal stability test.

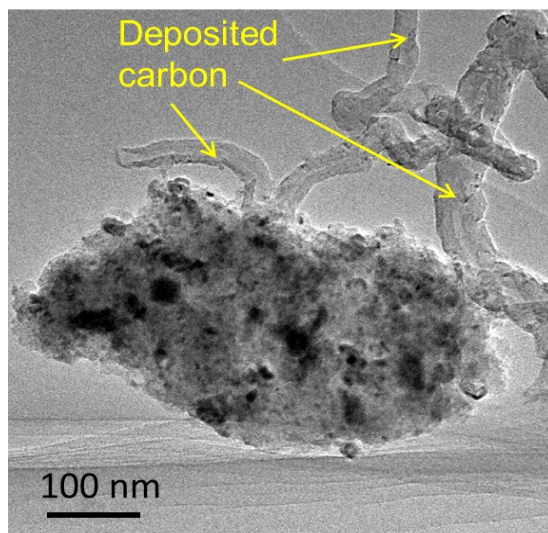

**Fig. S5** TEM images of 20Ni80SiC after lifetime test.
